# Supplementary material for: Stimuli-responsive Zn( ii ) complexes showing the structural conversion and on/off switching of catalytic properties
Source: Royal Society of Chemistry journal article supplement (doi:10.1039/d4ra06058j), 2024-01-01
Supplement: d4ra06058j1.pdf [file d4ra06058j1.pdf]

## Supporting Information

### **Stimuli responsive Zn(II) complexes showing structural conversion and on/off switching of catalytical properties**

So Hyeon Kwon<sup>a</sup>, Sunwoo Lee,<sup>b</sup> Jacopo Tessarolo<sup>\*,b</sup>, Haeri Lee<sup>\*,a</sup>

<sup>a</sup>Department of Chemistry, Hannam University, Daejeon, 34054, Republic of Korea

<sup>b</sup>Department of Chemistry, Chonnam National University, Gwangju, 61186, Republic of Korea

\*Corresponding authors: haeri.lee@hnu.ac.kr; jacopo@jnu.ac.kr

# Contents

|                                                                                |    |
|--------------------------------------------------------------------------------|----|
| 1. General procedures.....                                                     | 3  |
| 2. Synthesis of ligands and zinc(II) complexes.....                            | 4  |
| 2.1 Preparation of the ligand .....                                            | 4  |
| 2.2 Synthesis of zinc(II) complexes .....                                      | 10 |
| 3. X-ray crystallography.....                                                  | 14 |
| 3.1 Data collection details .....                                              | 14 |
| 4. Catalytic properties .....                                                  | 20 |
| 4.1 General procedure for catalysis.....                                       | 20 |
| 4.2 Recyclability experiment .....                                             | 29 |
| 4.3 Experiment for switching effect in Catalysis for Transesterification ..... | 32 |
| 5. Reference.....                                                              | 36 |

## 1. General procedures

All chemicals were obtained from commercial sources and used without further purification. NMR measurements for ligand were all conducted at 298 K on Varian USA Unity-Inova 500 at the Seoul Center of the Korea Basic Science Institute (KBSI). Mass analyses were carried out by MALDI/ESI Synapt Hight-Dimensional Mass Spectrometer at the Ochang Center of KBSI. Magritek spinsolve 60 ULTRA ( $^1\text{H}$ ,  $^{19}\text{F}$ ) were used for catalytic reaction monitoring. Thermogravimetric analyses all except  $[\text{ZnL}]_n$  were carried out under a  $\text{N}_2$  atmosphere at a scan rate 10  $^\circ\text{C}/\text{min}$  using TA SDT Q600 and DSC Q200 at Busan center of KBSI. Thermogravimetric analysis for  $[\text{ZnL}]_n$  was measured by Thermogravimetry Analyzer of Netzsch (TG 209 F3 Tarsus) at Hannam University. All infrared spectra were obtained using IR Spirit, Shimadzu. Powder X-ray diffraction patterns were collected by D2 Phaser at Hannam University.

## 2. Synthesis of ligands and zinc(II) complexes

### 2.1 Preparation of the ligand

#### 2.1.1 (*E*)-*N',N',N'',N''*-tetra(2-pyridyl)-2-butene-1,4-diaine (**L**)

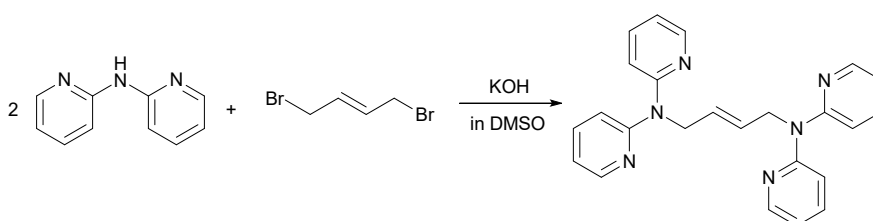

**Figure S1.** Synthetic procedure for **L**.

To a stirred solution of 2,2'-dipyridylamine (1.82 g, 10.5 mmol) in 1.5 mL DMSO, grinded KOH (0.71 g, 12 mmol) were added. The reaction mixture was stirred for 21 h at room temperature before the addition of *trans*-1,4-dibromo-2-butene (1.09 g, 5 mmol) in DMSO (1.5 mL). After further stirring for 3 h at r.t., the mixture was filtered. DMSO was removed by extraction with CHCl<sub>3</sub> and water. Organic layer were dried by MgSO<sub>4</sub>. Then crude product was purified by column chromatography (ethyl acetate/*n*-hexane, 50%) to afford the product as a yellow crystalline solid (1.4 g, 72% yield). m.p. 117 °C. <sup>1</sup>H NMR (800 MHz, CD<sub>3</sub>OD, 298 K, δ): 8.20 (dd, *J* = 5.0, 1.9 Hz, 4H), 7.60 (dd, *J* = 7.2, 2.0 Hz, 4H), 6.97 (d, *J* = 8.3 Hz, 4H), 6.95 (ddd, *J* = 7.2, 4.9, 0.9 Hz, 4H), 5.80 – 5.72 (m, 2H), 4.73 – 4.65 (m, 4H). <sup>13</sup>C NMR (200 MHz, CD<sub>3</sub>OD, 298K, δ): 156.94, 147.46, 137.84, 128.44, 117.41, 115.22, 49.37. IR (KBr, cm<sup>-1</sup>): 1582s, 1559m, 1467s, 1423s, 1381m, 1361m, 1324m, 1282w, 1256w, 1238s, 1166w, 1152w, 1092w, 997w, 865w, 778m, 643w, 611w. HR-ESI-Mass (*m/z*): 395.1983 (calcd [C<sub>24</sub>H<sub>22</sub>N<sub>6</sub> + H<sup>+</sup>]<sup>+</sup> = 395.1979).

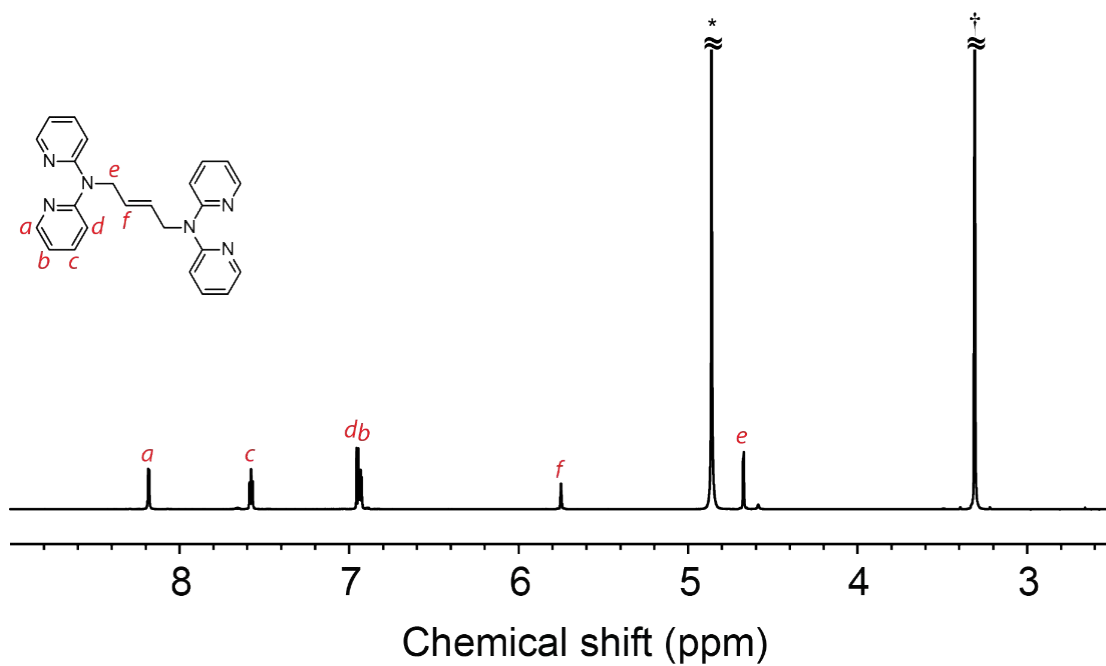

**Figure S2.** <sup>1</sup>H NMR spectrum for L in CD<sub>3</sub>OD (†Solvent residual signal, \*HDO).

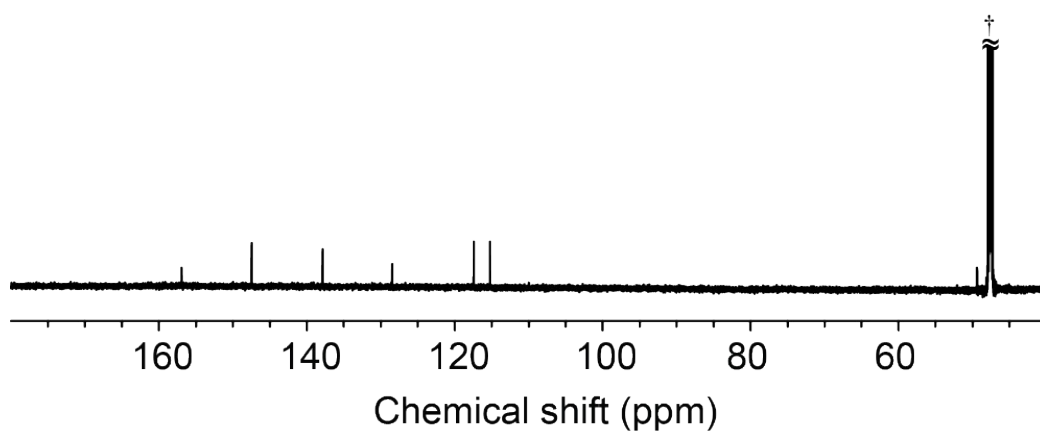

**Figure S3.**  $^{13}\text{C}$  NMR spectrum for **L** in  $\text{CD}_3\text{OD}$  ( $\dagger$ solvent).

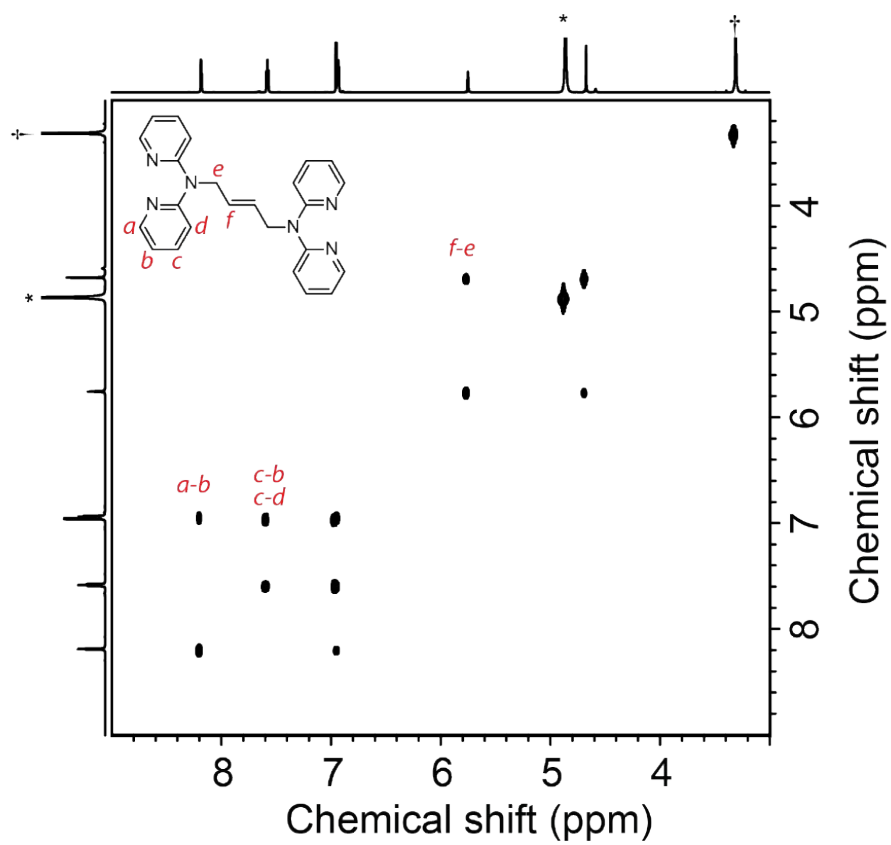

**Figure S4.**  $^1\text{H}$ - $^1\text{H}$  COSY spectrum for **L** in  $\text{CD}_3\text{OD}$  (†Solvent residual signal, \*HDO).

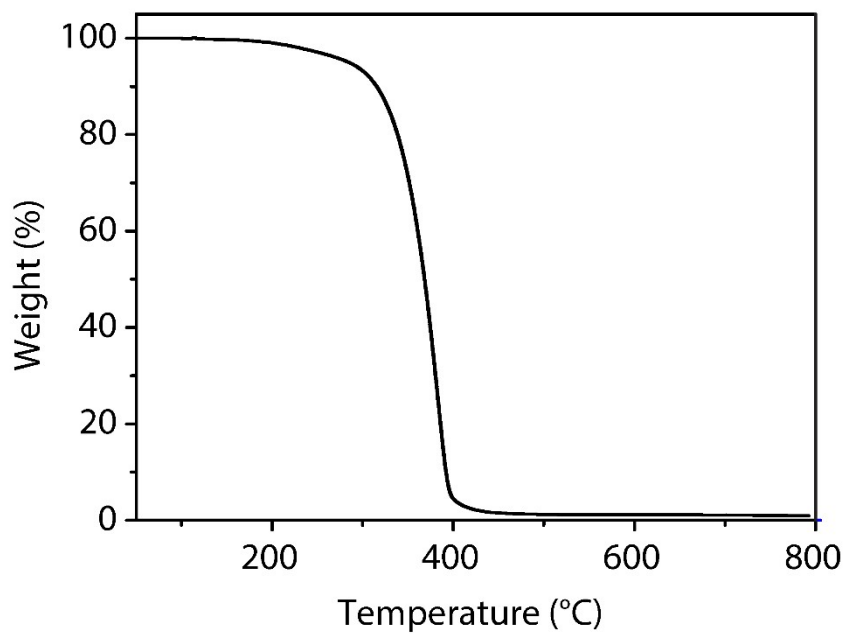

**Figure S5.** TG analysis for L (dec. 117 °C, remains: 0% at 800 °C).



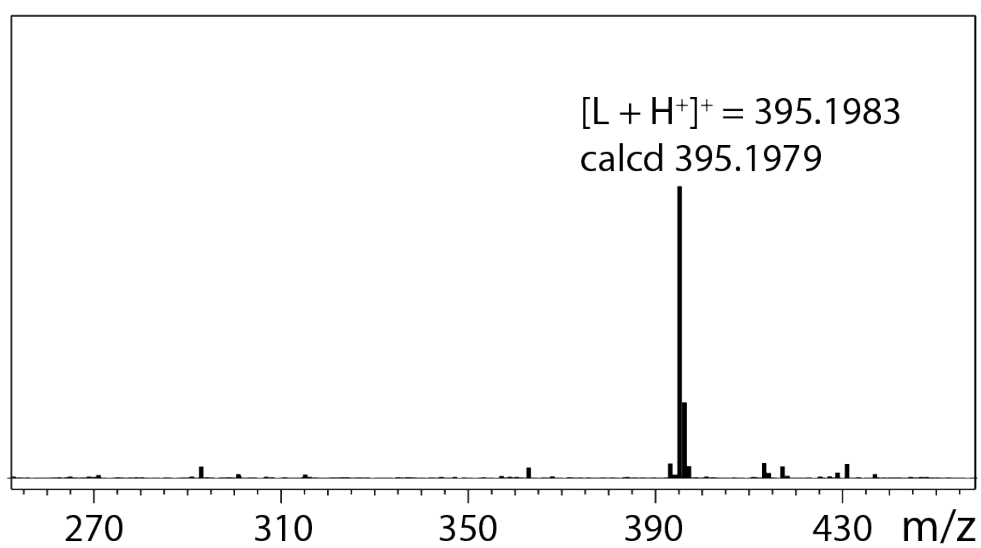

**Figure S6.** High-resolution ESI-Mass spectrum for **L**,  $m/z$  395.1983 (calcd  $[C_{24}H_{22}N_6+H^+]^+ = 395.1979$ ).

## 2.2 Synthesis of zinc(II) complexes

### 2.2.1 Synthesis of $[Zn_2Cl_4L]$

A mixed solution of methanol and dichloromethane (10 mL) of (*E*)-*N',N',N'',N''*-tetra(2-pyridyl)-2-butene-1,2-diamine (**L**) (39 mg, 0.1 mmol) was slowly added to a methanol solution (10 mL) of zinc(II) chloride (14 mg, 50  $\mu$ mol). After a day, colorless crystals of  $Zn_2Cl_4L$  were obtained in 89% (30 mg) yield. m.p. 316 °C (dec.). IR (KBr pellet,  $cm^{-1}$ ): 3068w, 3031w, 2876w, 1602s, 1574s, 1489m, 1459s, 1437s, 1379m, 1347s, 1317w, 1296w, 1274w, 1243s, 1209w, 1160m, 1137m, 1083w, 1047m, 1026m, 998w, 983w, 885m, 797s, 774s, 756s, 651w, 603m, 485w, 423m.

### 2.2.2 Synthesis of $[Zn_2Br_4L]$

$[Zn_2Br_4L]$  was prepared in the same manner as  $[Zn_2Cl_4L]$ , using  $ZnBr_2$  instead of  $ZnCl_2$  in a 80% (34 mg) yield. m.p. 320 °C (dec.). IR (KBr pellet,  $cm^{-1}$ ): 1600s, 1574s, 1488m, 1467s, 1457s, 1445s, 1376w, 1348m, 1242m, 1209w, 1161w, 1137w, 1047m, 1026m, 995w, 980w, 884m, 797s, 774s, 754s, 652w, 423m.

### 2.2.3 Synthesis of $[Zn_2I_4L]$

$[Zn_2I_4L]$  was prepared in the same manner as  $[Zn_2Cl_4L]$ , using  $ZnI_2$  instead of  $ZnCl_2$  in a 78% (40 mg) yield. m.p. 320 °C (dec.) IR (KBr pellet,  $cm^{-1}$ ): 3063w, 3024w, 2869w, 1602s, 1572s, 1489m, 1471s, 1456s, 1438s, 1379m, 1336s, 1302w, 1234s, 1162m, 1137m, 1080w, 1062w, 1042w, 1026m, 990w, 970w, 887m, 777s, 747m, 645w, 608w, 580w, 414w.

### 2.2.4 Synthesis of *cis*- and *trans*- $[ZnL(MeOH)_2]_n(ClO_4)_{2n} \cdot 2MeOH$ (*cis*-, *trans*- $[ZnL]_n$ )

A methanol solution of **L** (47 mg, 0.12 mmol) was added into a methanol solution of  $Zn(ClO_4)_2 \cdot 6H_2O$  (45 mg, 0.12 mmol). After 2 days, colorless crystals of  $[ZnL(MeOH)_2]_n(ClO_4)_{2n} \cdot 2nMeOH$  were obtained in 84% (94 mg) yield. m.p. 318 °C (dec.). IR (KBr pellet,  $cm^{-1}$ ): 3063w, 3012w, 2930w, 2875w, 1637m, 1601s, 1582s, 1559m, 1468s, 1445s, 1425s, 1377m, 1347m, 1324m, 1298m, 1274m, 1240m, 1208m, 1142s ( $\nu ClO_4^-$ ), 1115s, 1085s, 1026m, 979m, 940w, 884m, 797m, 774m, 755m, 636s, 625s, 603w, 484w, 422w.

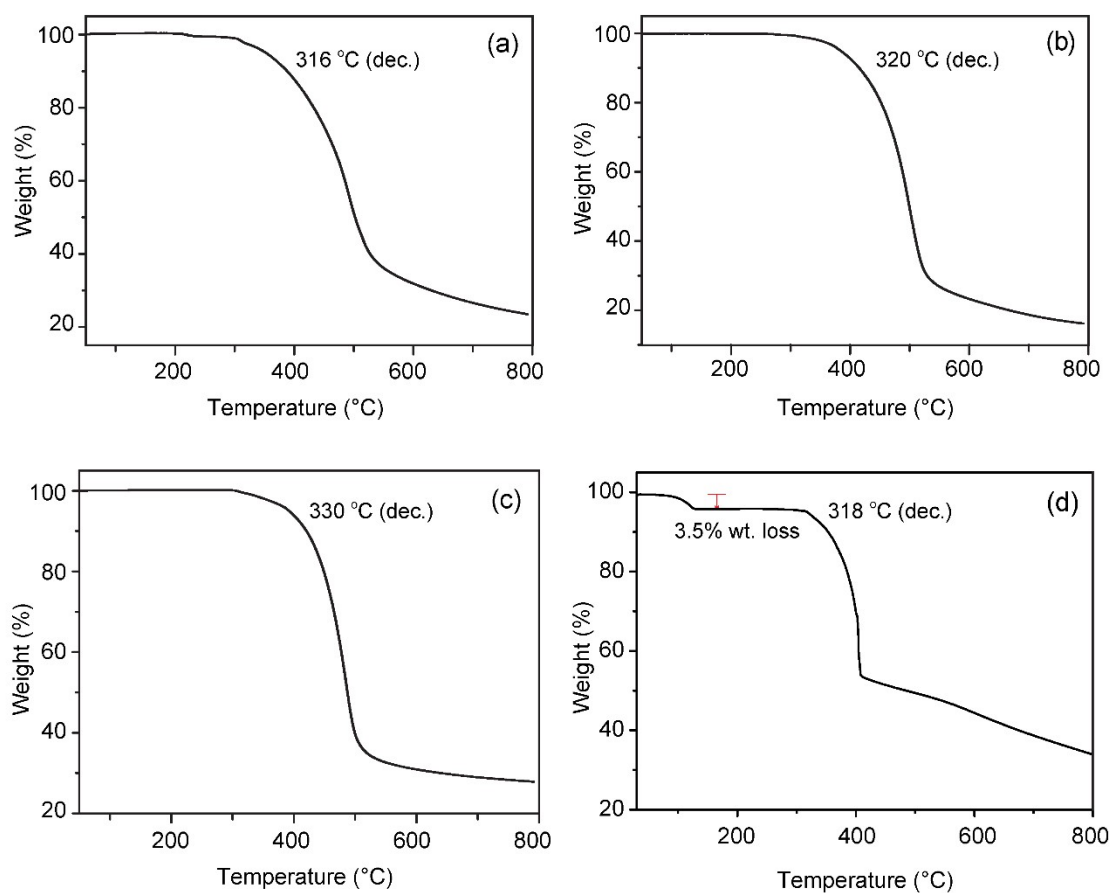

**Figure S7.** TG analyses for  $[Zn_2Cl_4L]$  (a),  $[Zn_2Br_4L]$  (b),  $[Zn_2I_4L]$  (c), and  $[ZnL]_n$  (d) under  $N_2$  atmosphere, scan rate =  $10\text{ }^\circ\text{C}/\text{min}$ .

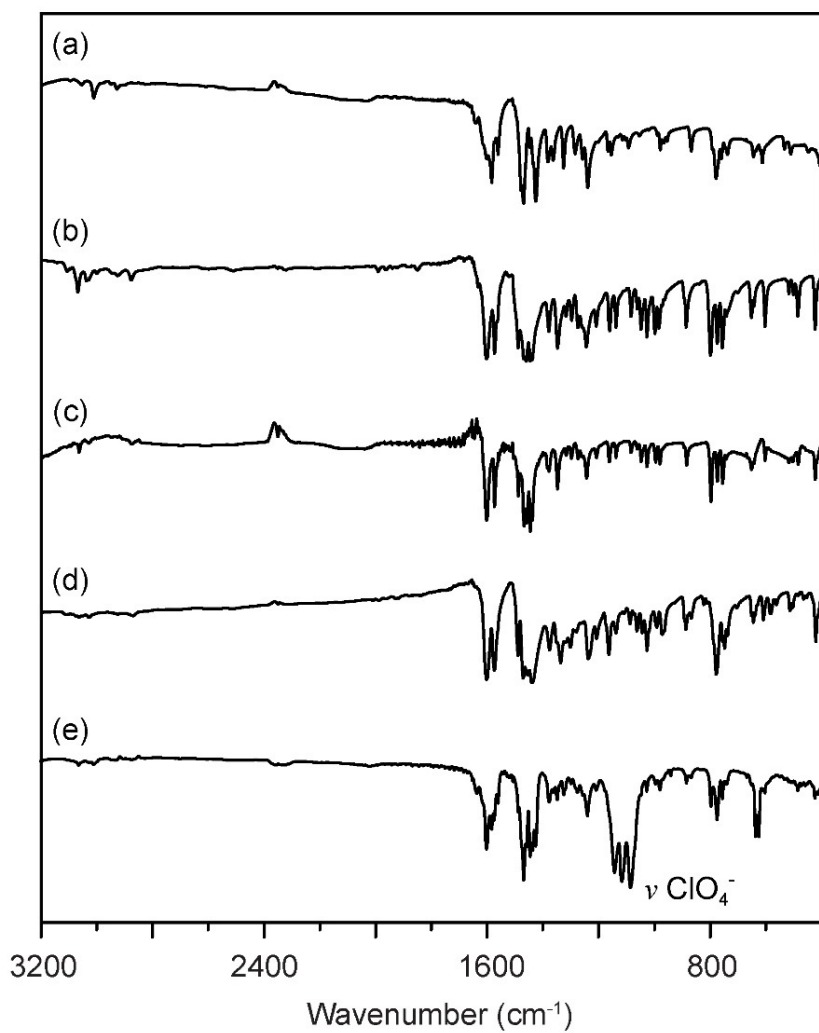

**Figure S8.** FT-IR spectra (in KBr mode) for **L** (a), [Zn<sub>2</sub>Cl<sub>4</sub>L] (b), [Zn<sub>2</sub>Br<sub>4</sub>L] (c), and [Zn<sub>2</sub>I<sub>4</sub>L] (d), and [ZnL]<sub>n</sub> (e).

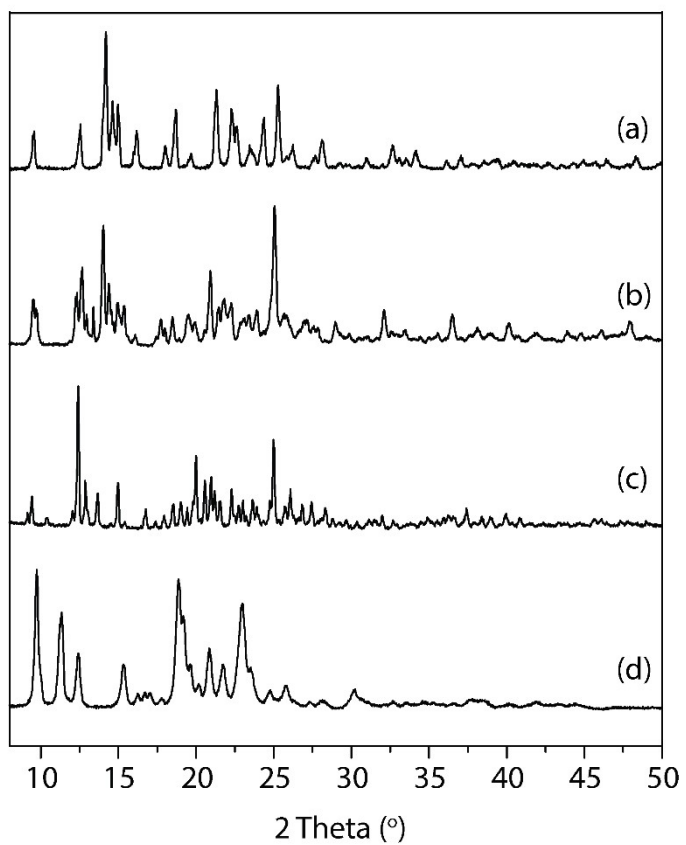

**Figure S9.** Powder XRD patterns for  $[\text{Zn}_2\text{Cl}_4\text{L}]$  (a),  $[\text{Zn}_2\text{Br}_4\text{L}]$  (b), and  $[\text{Zn}_2\text{I}_4\text{L}]$  (c), and  $[\text{ZnL}]_n$  (d).

### 3. X-ray crystallography

#### 3.1 Data collection details

X-ray diffraction data for were collected on a Bruker APEX III for  $[\text{Zn}_2\text{X}_4\text{L}]$  ( $\text{X} = \text{Cl}, \text{Br}, \text{I}$ ), Bruker D8 Venture for  $[\text{ZnL}]_n$  coated with Paraton-*N* oil. Data were collected in-house X-ray diffractometer equipped with an INCOATEC microfocus sealed tube ( $\text{I}\mu\text{S } 3.0$ ) using  $\text{Mo } K_\alpha$ . For all X-ray diffraction data, thirty-six (36) frames of 2D diffraction images from CCD detector were collected and processed to obtain the cell parameters and orientation matrix. The data were corrected for Lorentz and polarization effects. All structures were solved by intrinsic phasing/direct methods using SHELXT<sup>1</sup> and refined with SHELXL (2018/3)<sup>2</sup> for full-matrix least-squares routines on  $F^2$  and ShelXle<sup>3</sup> as a graphical user interface. The non-hydrogen atoms were refined anisotropically, and the hydrogen atoms were placed in calculated positions and refined only for the isotropic thermal factors. The crystal parameters and procedural information corresponding to the data collection and structure refinement are listed in Table S1.

**Table S1.** Crystal data for **L**, [Zn<sub>2</sub>Cl<sub>4</sub>L], [Zn<sub>2</sub>Br<sub>4</sub>L], [Zn<sub>2</sub>I<sub>4</sub>L], *trans*-[ZnL]<sub>n</sub>·2MeOH, and *cis*-[ZnL]<sub>n</sub>·2MeOH

|                                                  | <b>L</b>                                       | [Zn <sub>2</sub> Cl <sub>4</sub> L]                                            | [Zn <sub>2</sub> Br <sub>4</sub> L]                                            | [Zn <sub>2</sub> I <sub>4</sub> L]                                            |
|--------------------------------------------------|------------------------------------------------|--------------------------------------------------------------------------------|--------------------------------------------------------------------------------|-------------------------------------------------------------------------------|
| CCDC No.                                         | 2144545                                        | 2144546                                                                        | 2144547                                                                        | 2144548                                                                       |
| Empirical formula                                | C <sub>24</sub> H <sub>22</sub> N <sub>6</sub> | C <sub>24</sub> H <sub>22</sub> Cl <sub>4</sub> N <sub>6</sub> Zn <sub>2</sub> | C <sub>24</sub> H <sub>22</sub> Br <sub>4</sub> N <sub>6</sub> Zn <sub>2</sub> | C <sub>24</sub> H <sub>22</sub> I <sub>4</sub> N <sub>6</sub> Zn <sub>2</sub> |
| Formula weight                                   | 394.47                                         | 667.01                                                                         | 844.85                                                                         | 1032.81                                                                       |
| Temperature (K)                                  | 194(2)                                         | 173(2)                                                                         | 173(2)                                                                         | 193(2)                                                                        |
| Wavelength (Å)                                   | 0.71073                                        | 0.71073                                                                        | 0.71073                                                                        | 0.71073                                                                       |
| Crystal system                                   | Monoclinic                                     | Monoclinic                                                                     | Monoclinic                                                                     | Monoclinic                                                                    |
| Space group                                      | <i>P</i> 2 <sub>1</sub> / <i>c</i>             | <i>P</i> 2 <sub>1</sub> / <i>n</i>                                             | <i>P</i> 2 <sub>1</sub> / <i>n</i>                                             | <i>P</i> 2 <sub>1</sub> / <i>c</i>                                            |
| a (Å)                                            | 8.21360(10)                                    | 7.9002(8)                                                                      | 8.1556(4)                                                                      | 14.9058(3)                                                                    |
| b (Å)                                            | 12.8837(2)                                     | 11.6313(12)                                                                    | 11.6931(7)                                                                     | 10.4325(2)                                                                    |
| c (Å)                                            | 9.3506(2)                                      | 14.4637(14)                                                                    | 14.6784(8)                                                                     | 20.5991(4)                                                                    |
| β (°)                                            | 97.3250(10)                                    | 90.130(3)                                                                      | 90.389(2)                                                                      | 109.4780(10)                                                                  |
| Volume (Å <sup>3</sup> )                         | 981.42(3)                                      | 1329.1(2)                                                                      | 1399.76(13)                                                                    | 3019.93(10)                                                                   |
| Z                                                | 2                                              | 2                                                                              | 2                                                                              | 4                                                                             |
| Density (calculated) (Mg/m <sup>3</sup> )        | 1.335                                          | 1.667                                                                          | 2.005                                                                          | 2.272                                                                         |
| Absorption coefficient (mm <sup>-1</sup> )       | 0.083                                          | 2.233                                                                          | 7.448                                                                          | 5.702                                                                         |
| F(000)                                           | 416                                            | 672                                                                            | 816                                                                            | 1920                                                                          |
| Crystal size (mm <sup>3</sup> )                  | 0.480 x 0.270 x 0.260                          | 0.056 x 0.041 x 0.019                                                          | 0.113 x 0.035 x 0.032                                                          | 0.420 x 0.410 x 0.240                                                         |
| Theta range for data collection (°)              | 2.500 to 28.403                                | 2.578 to 26.497                                                                | 2.775 to 27.146                                                                | 1.449 to 28.280                                                               |
| Index ranges                                     | -10<=h<=10<br>-17<=k<=17<br>-12<=l<=10         | -9<=h<=9<br>-14<=k<=14<br>-18<=l<=18                                           | -10<=h<=10<br>-15<=k<=15<br>-18<=l<=18                                         | -19<=h<=19<br>-13<=k<=13<br>-27<=l<=26                                        |
| Reflections collected                            | 16732                                          | 18583                                                                          | 25720                                                                          | 52213                                                                         |
| Independent reflections                          | 2450                                           | 2738                                                                           | 3073                                                                           | 7464                                                                          |
| Completeness to theta (°)(25.242°)               | 99.4                                           | 99.3                                                                           | 99.1                                                                           | 99.7                                                                          |
| Absorption correction                            | Semi-empirical from equivalents                | Semi-empirical from equivalents                                                | Semi-empirical from equivalents                                                | Semi-empirical from equivalents                                               |
| Max. and min. transmission                       | 1.000 and 0.789                                | 0.7456 and 0.6543                                                              | 0.7455 and 0.4086                                                              | 1.000 and 0.789                                                               |
| Refinement method                                | Full-matrix least-squares on F <sup>2</sup>    | Full-matrix least-squares on F <sup>2</sup>                                    | Full-matrix least-squares on F <sup>2</sup>                                    | Full-matrix least-squares on F <sup>2</sup>                                   |
| Data / restraints / parameters                   | 2450 / 0 / 136                                 | 2738 / 0 / 164                                                                 | 3073 / 0 / 164                                                                 | 7464 / 0 / 325                                                                |
| Goodness-of-fit on F <sup>2</sup>                | 1.044                                          | 1.161                                                                          | 1.131                                                                          | 1.031                                                                         |
| Final R indices [I>2σ(I)]                        | R1 = 0.0405<br>wR2 = 0.1073                    | R1 = 0.0747<br>wR2 = 0.1247                                                    | R1 = 0.0338<br>wR2 = 0.0682                                                    | R1 = 0.0340<br>wR2 = 0.0705                                                   |
| R indices (all data)                             | R1 = 0.0444<br>wR2 = 0.1116                    | R1 = 0.0892<br>wR2 = 0.1295                                                    | R1 = 0.0509<br>wR2 = 0.0787                                                    | R1 = 0.0419<br>wR2 = 0.0739                                                   |
| Largest diff. peak and hole (e·Å <sup>-3</sup> ) | 0.255 and -0.239                               | 0.507 and -0.909                                                               | 0.487 and -0.709                                                               | 1.724 and -1.502                                                              |

Table S1. (Continued)

|                                                     | <i>trans</i> -[ZnL] <sub>n</sub> ·2MeOH                                           | <i>cis</i> -[ZnL] <sub>n</sub> ·MeOH                                                            |
|-----------------------------------------------------|-----------------------------------------------------------------------------------|-------------------------------------------------------------------------------------------------|
| CCDC No.                                            | 2331257                                                                           | 2364848                                                                                         |
| Empirical formula                                   | C <sub>28</sub> H <sub>38</sub> Cl <sub>2</sub> N <sub>6</sub> O <sub>12</sub> Zn | C <sub>54</sub> H <sub>68</sub> Cl <sub>4</sub> N <sub>12</sub> O <sub>22</sub> Zn <sub>2</sub> |
| Formula weight                                      | 786.91                                                                            | 1509.74                                                                                         |
| Temperature (K)                                     | 173(2)                                                                            | 173(2)                                                                                          |
| Wavelength (Å)                                      | 0.71073                                                                           | 0.71073                                                                                         |
| Crystal system                                      | Monoclinic                                                                        | Triclinic                                                                                       |
| Space group                                         | <i>P</i> 2 <sub>1</sub> / <i>n</i>                                                | <i>P</i> -1                                                                                     |
| a (Å)                                               | 7.9366(6)                                                                         | 10.9854(9)                                                                                      |
| b (Å)                                               | 19.2414(16)                                                                       | 12.5818(11)                                                                                     |
| c (Å)                                               | 11.2733(9)                                                                        | 25.124(2)                                                                                       |
| α (°)                                               | -                                                                                 | 81.710(2)                                                                                       |
| β (°)                                               | 96.936(2)                                                                         | 80.594(3)                                                                                       |
| γ (°)                                               | -                                                                                 | 75.975(2)                                                                                       |
| Volume (Å <sup>3</sup> )                            | 1709.0(2)                                                                         | 3303.8(5)                                                                                       |
| Z                                                   | 2                                                                                 | 2                                                                                               |
| Density (calculated)<br>(Mg/m <sup>3</sup> )        | 1.529                                                                             | 1.518                                                                                           |
| Absorption coefficient<br>(mm <sup>-1</sup> )       | 0.944                                                                             | 0.971                                                                                           |
| F(000)                                              | 816                                                                               | 1560                                                                                            |
| Crystal size (mm <sup>3</sup> )                     | 0.150 x 0.080 x 0.080                                                             | 0.081 x 0.049 x 0.037                                                                           |
| Theta range for data<br>collection (°)              | 2.792 to 26.368                                                                   | 2.480 to 27.064                                                                                 |
|                                                     | -9<=h<=9                                                                          | -14<=h<=14                                                                                      |
| Index ranges                                        | -24<=k<=24                                                                        | -16<=k<=16                                                                                      |
|                                                     | -14<=l<=14                                                                        | -32<=l<=32                                                                                      |
| Reflections collected                               | 61409                                                                             | 112356                                                                                          |
| Independent reflections                             | 3457                                                                              | 14416                                                                                           |
|                                                     | [R(int) = 0.0821]                                                                 | [R(int) = 0.0948]                                                                               |
| Completeness to theta<br>(%)(25.242°)               | 99.2                                                                              | 99.90                                                                                           |
| Absorption correction                               | Semi-empirical from<br>equivalents                                                | Semi-empirical from<br>equivalents                                                              |
| Max. and min.<br>transmission                       | 0.7454 and 0.4885                                                                 | 0.7455 and 0.6586                                                                               |
| Refinement method                                   | Full-matrix least-squares<br>on F <sup>2</sup>                                    | Full-matrix least-squares<br>on F <sup>2</sup>                                                  |
| Data / restraints /<br>parameters                   | 3457 / 0 / 225                                                                    | 14416 / 723 / 1030                                                                              |
| Goodness-of-fit on F <sup>2</sup>                   | 1.054                                                                             | 1.074                                                                                           |
| Final R indices<br>[I>2σ(I)]                        | R1 = 0.0360<br>wR2 = 0.0924                                                       | R1 = 0.0570<br>wR2 = 0.1160                                                                     |
| R indices (all data)                                | R1 = 0.0421<br>wR2 = 0.0981                                                       | R1 = 0.0933<br>wR2 = 0.1334                                                                     |
| Largest diff. peak and<br>hole (e·Å <sup>-3</sup> ) | 0.572 and -0.489                                                                  | 0.685 and -0.453                                                                                |



**Table S2.** Selected bonds (Å) and angles (°) for [Zn<sub>2</sub>Cl<sub>4</sub>L], [Zn<sub>2</sub>Br<sub>4</sub>L], [Zn<sub>2</sub>I<sub>4</sub>L], *trans*-[ZnL]<sub>n</sub>·2MeOH, and *cis*-[ZnL]<sub>n</sub>·2MeOH

| [Zn <sub>2</sub> Cl <sub>4</sub> L] |            | [Zn <sub>2</sub> Br <sub>4</sub> L] |            | [Zn <sub>2</sub> I <sub>4</sub> L] |            |
|-------------------------------------|------------|-------------------------------------|------------|------------------------------------|------------|
| Zn(1)-N(1)                          | 2.045(5)   | Zn(1)-N(1)                          | 2.043(4)   | Zn(1)-I(1)                         | 2.5574(6)  |
| Zn(1)-N(3)                          | 2.047(5)   | Zn(1)-N(3)                          | 2.044(4)   | Zn(1)-N(1)                         | 2.037(4)   |
| Zn(1)-Cl(2)                         | 2.1988(19) | Zn(1)-Br(2)                         | 2.3378(7)  | Zn(1)-N(3)                         | 2.025(3)   |
| Zn(1)-Cl(1)                         | 2.2173(18) | Zn(1)-Br(1)                         | 2.3553(7)  | Zn(1)-I(2)                         | 2.5328(6)  |
|                                     |            |                                     |            | Zn(2)-N(4)                         | 2.028(3)   |
|                                     |            |                                     |            | Zn(2)-N(6)                         | 2.036(3)   |
|                                     |            |                                     |            | Zn(2)-I(3)                         | 2.5470(6)  |
|                                     |            |                                     |            | Zn(2)-I(4)                         | 2.5487(6)  |
| N(1)-Zn(1)-N(3)                     | 89.58(19)  | N(1)-Zn(1)-N(3)                     | 89.88(14)  | N(3)-Zn(1)-N(1)                    | 89.91(15)  |
| N(1)-Zn(1)-Cl(2)                    | 107.11(15) | N(1)-Zn(1)-Br(2)                    | 108.08(10) | N(3)-Zn(1)-I(2)                    | 114.63(10) |
| N(3)-Zn(1)-Cl(2)                    | 116.00(15) | N(3)-Zn(1)-Br(2)                    | 116.15(10) | N(1)-Zn(1)-I(2)                    | 111.05(11) |
| N(1)-Zn(1)-Cl(1)                    | 113.71(15) | N(1)-Zn(1)-Br(1)                    | 113.45(10) | N(3)-Zn(1)-I(1)                    | 108.86(10) |
| N(3)-Zn(1)-Cl(1)                    | 107.90(14) | N(3)-Zn(1)-Br(1)                    | 107.57(10) | N(1)-Zn(1)-I(1)                    | 108.81(10) |
| Cl(2)-Zn(1)-Cl(1)                   | 118.89(8)  | Br(2)-Zn(1)-Br(1)                   | 118.31(3)  | I(2)-Zn(1)-I(1)                    | 119.55(2)  |
|                                     |            |                                     |            | N(4)-Zn(2)-N(6)                    | 88.75(13)  |
|                                     |            |                                     |            | N(4)-Zn(2)-I(3)                    | 111.11(10) |
|                                     |            |                                     |            | N(6)-Zn(2)-I(3)                    | 108.87(11) |
|                                     |            |                                     |            | N(4)-Zn(2)-I(4)                    | 108.74(10) |
|                                     |            |                                     |            | N(6)-Zn(2)-I(4)                    | 117.86(10) |
|                                     |            |                                     |            | I(3)-Zn(2)-I(4)                    | 117.75(2)  |

**Table S2.** (Continued)

| <i>trans</i> -[ZnL] <sub>n</sub> ·2MeOH      |            | <i>cis</i> -[ZnL] <sub>n</sub> ·MeOH |            |
|----------------------------------------------|------------|--------------------------------------|------------|
| Zn(1)-N(1)                                   | 2.1145(17) | Zn(1)-N(48)                          | 2.101(3)   |
| Zn(1)-N(2)                                   | 2.1206(18) | Zn(1)-O(91)                          | 2.120(3)   |
| Zn(1)-O(1)                                   | 2.2026(15) | Zn(1)-N(18)                          | 2.123(3)   |
|                                              |            | Zn(1)-N(11)                          | 2.151(3)   |
|                                              |            | Zn(1)-N(41)                          | 2.173(3)   |
|                                              |            | Zn(1)-O(93)                          | 2.189(3)   |
|                                              |            | Zn(2)-N(35)                          | 2.097(3)   |
|                                              |            | Zn(2)-N(28)                          | 2.106(3)   |
|                                              |            | Zn(2)-N(65) <sup>#2</sup>            | 2.119(3)   |
|                                              |            | Zn(2)-N(58) <sup>#2</sup>            | 2.137(3)   |
| N(1)-Zn(1)-N(1) <sup>#1</sup>                | 180.00(8)  | N(48)-Zn(1)-O(91)                    | 92.38(12)  |
| N(1)-Zn(1)-N(2) <sup>#1</sup>                | 96.05(7)   | N(48)-Zn(1)-N(18)                    | 99.41(11)  |
| N(1) <sup>#1</sup> -Zn(1)-N(2) <sup>#1</sup> | 83.95(7)   | O(91)-Zn(1)-N(18)                    | 168.08(12) |
| N(1)-Zn(1)-N(2)                              | 83.95(7)   | N(48)-Zn(1)-N(11)                    | 94.05(11)  |
| N(1) <sup>#1</sup> -Zn(1)-N(2)               | 96.05(7)   | O(91)-Zn(1)-O(93)                    | 82.41(12)  |
| N(2) <sup>#1</sup> -Zn(1)-N(2)               | 180.00(7)  | N(18)-Zn(1)-N(41)                    | 96.09(11)  |
| N(1)-Zn(1)-O(1) <sup>#1</sup>                | 88.60(6)   | N(11)-Zn(1)-N(41)                    | 178.60(11) |
| N(1) <sup>#1</sup> -Zn(1)-O(1) <sup>#1</sup> | 91.40(6)   | N(48)-Zn(1)-O(93)                    | 174.79(12) |
| N(2) <sup>#1</sup> -Zn(1)-O(1) <sup>#1</sup> | 90.93(6)   | O(91)-Zn(1)-O(93)                    | 82.41(12)  |
| N(2)-Zn(1)-O(1) <sup>#1</sup>                | 89.07(6)   | N(35)-Zn(2)-O(95)                    | 92.55(13)  |
| N(1)-Zn(1)-O(1)                              | 91.40(6)   | N(28)-Zn(2)-O(95)                    | 88.25(12)  |
| N(1) <sup>#1</sup> -Zn(1)-O(1)               | 88.60(6)   | N(35)-Zn(2)-O(97)                    | 173.03(12) |
| N(2) <sup>#1</sup> -Zn(1)-O(1)               | 89.07(6)   | N(28)-Zn(2)-O(97)                    | 93.63(11)  |
| N(2)-Zn(1)-O(1)                              | 90.93(6)   | O(95)-Zn(2)-O(97)                    | 80.84(12)  |
| O(1) <sup>#1</sup> -Zn(1)-O(1)               | 180        |                                      |            |

<sup>#1</sup>-x+1,-y+1,-z+1<sup>#2</sup> x-1,y,z

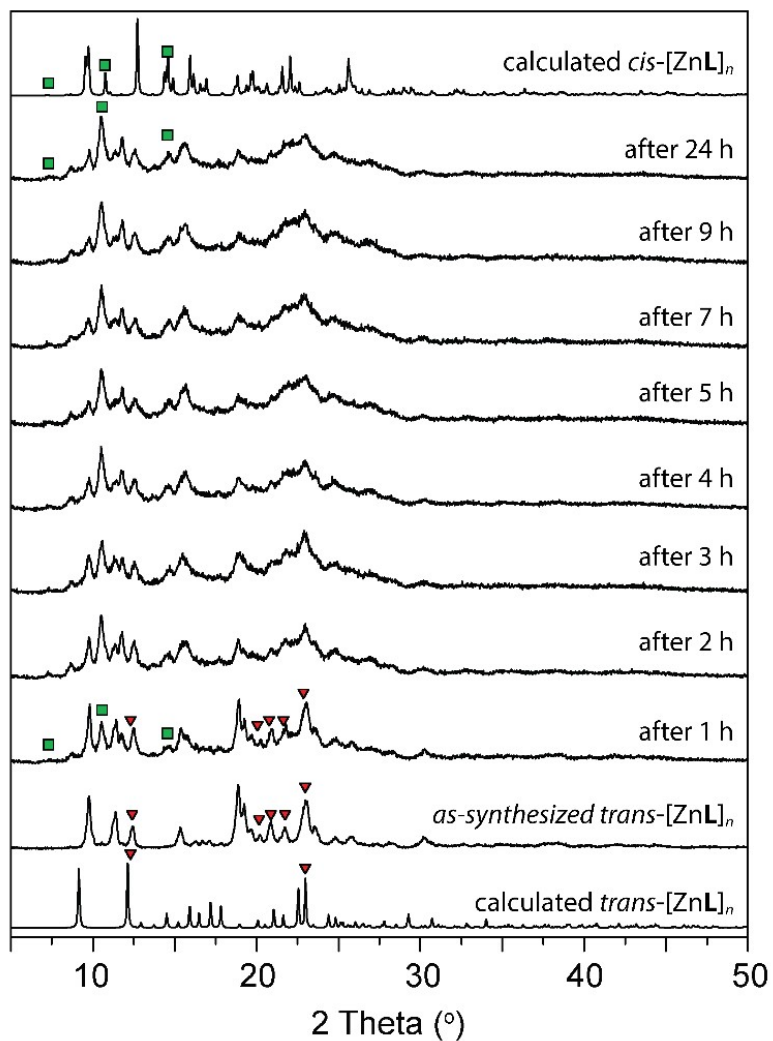

**Figure S10.** Powder XRD patterns for time-dependent  $[\text{ZnL}]_n$  after exposure to methanol at 50 °C with vigorous stirring (symbol code: green, matching peaks to calculated X-ray diffraction pattern of *cis*- $[\text{ZnL}]_n$ ; red, calculated *trans*- $[\text{ZnL}]_n$ )

## 4. Catalytic properties

### 4.1 General procedure for catalysis

Transesterification reaction of each substrate was performed in a 2 mL vials equipped with temperature controlling system with a reaction block. Phenyl acetate (**Sub-1**), p-tolyl acetate (**Sub-2**), 4-fluorophenyl acetate (**Sub-3**), pentafluorophenyl acetate (**Sub-4**), and 4-nitrophenyl acetate (**Sub-5**) were used for substrates. The temperature controller ensured a constant temperature of the reaction block with a precision of 1 K. 500  $\mu\text{mol}$  of substrate in 500  $\mu\text{L}$  methanol was added into the reaction vial charged with suggested amount of each Zn(II) complex. The reaction solution was vigorously stirred at 50  $^{\circ}\text{C}$ . The reaction was monitored by Time dependent  $^1\text{H}$  and  $^{19}\text{F}$  NMR spectroscopy. Reaction mixture samples of 20  $\mu\text{L}$  were obtained and diluted with 500  $\mu\text{L}$  of acetone- $d_6$ . The catalytic yields were determined by the integrating the NMR spectra corresponding to the products of both methyl acetate ( $-\text{CH}_3$  or  $-\text{OCH}_3$ ) and aryl alcohol.

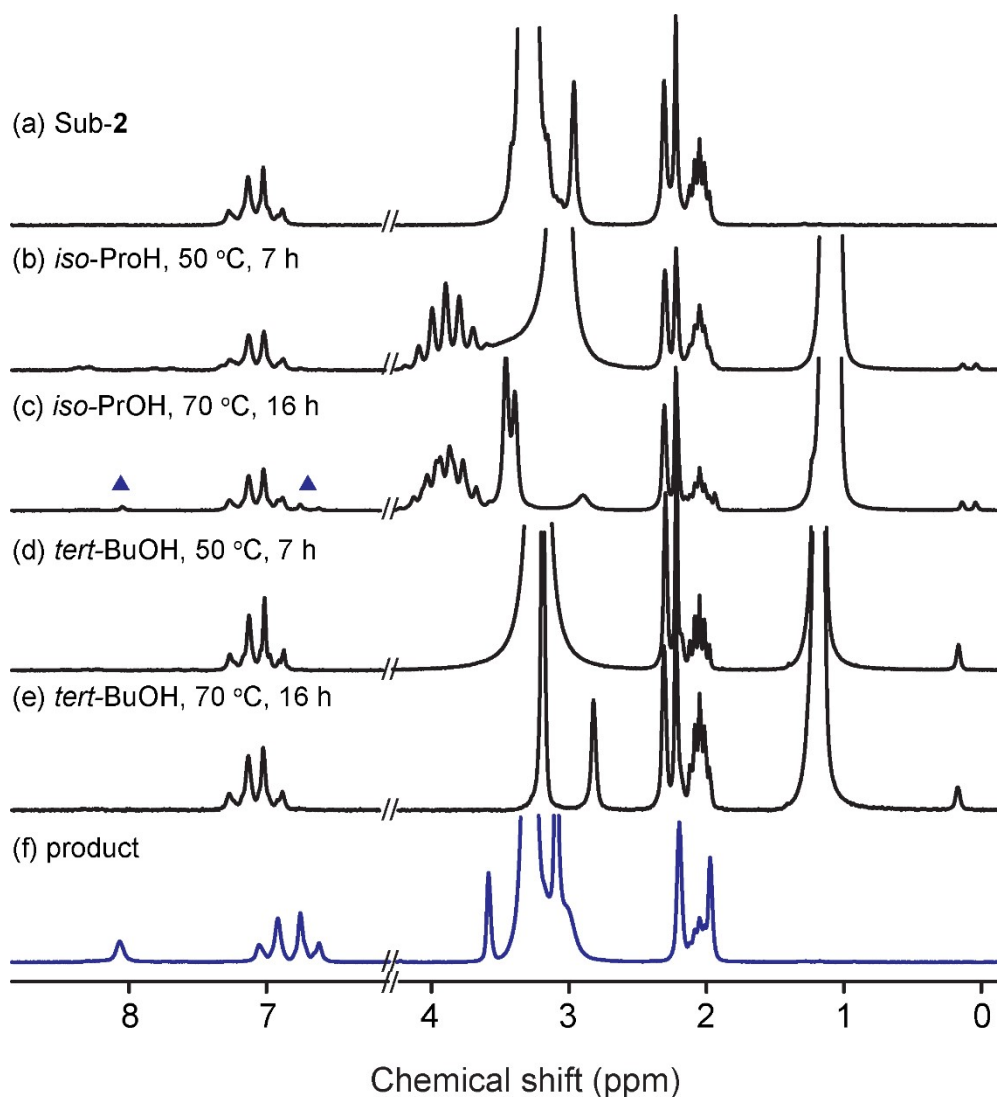

**Figure S11.** NMR monitoring for transesterification reaction of *p*-tolyl acetate (**Sub-2**, a) by changing alcohols. *iso*-propanol was used for the catalytic reaction with cat. 10 mol%  $[\text{ZnL}]_n$  under two different conditions, 50 °C for 7 hours and 70 °C for 16 hours (b, c, respectively). *Tert*-butanol was used for the catalytic reaction with cat. 10 mol%  $[\text{ZnL}]_n$  at 50 °C for 7 hours and 70 °C for 16 hours (d, e, respectively). Blue triangles and spectrum (f) indicate the expected product.

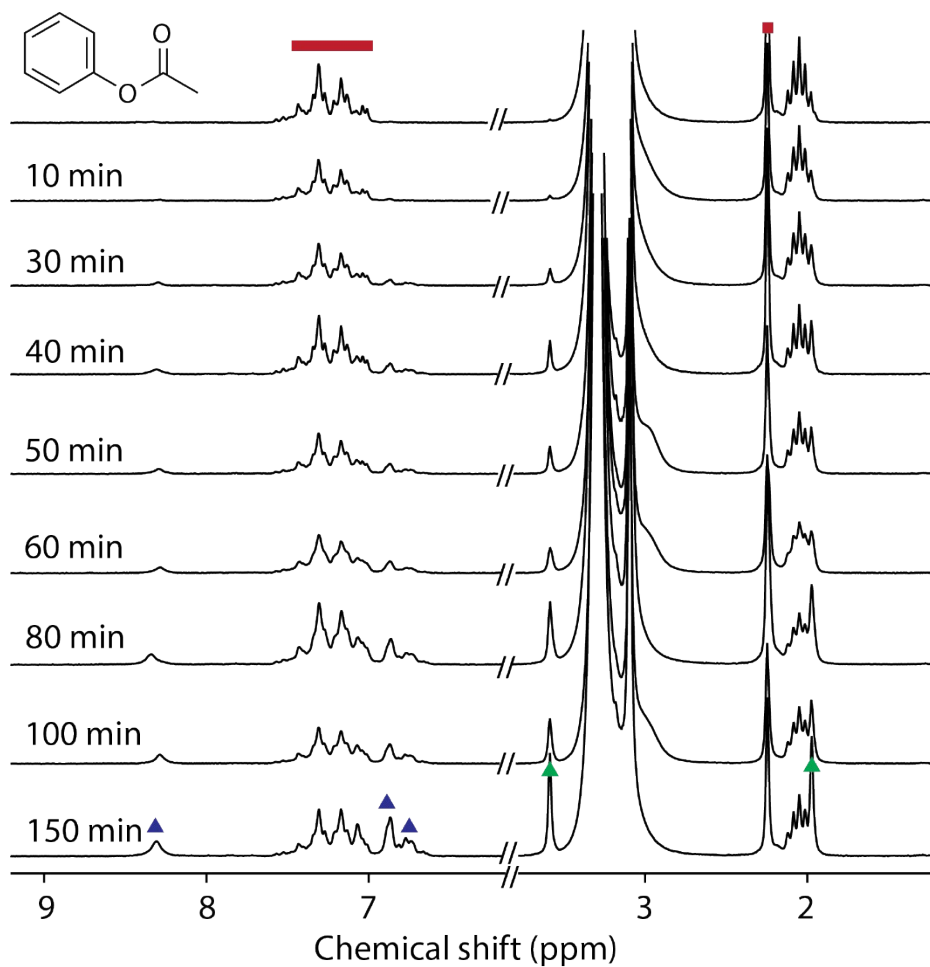

**Figure S12.** Time-dependent NMR monitoring for transesterification reaction of phenyl acetate (**Sub-1**, 500  $\mu$ mol, 68 mg) and methanol with cat. 10 mol% (19.5 mg)  $[\text{ZnL}]_n$  (red: substrate, green: methyl acetate, blue: phenol).

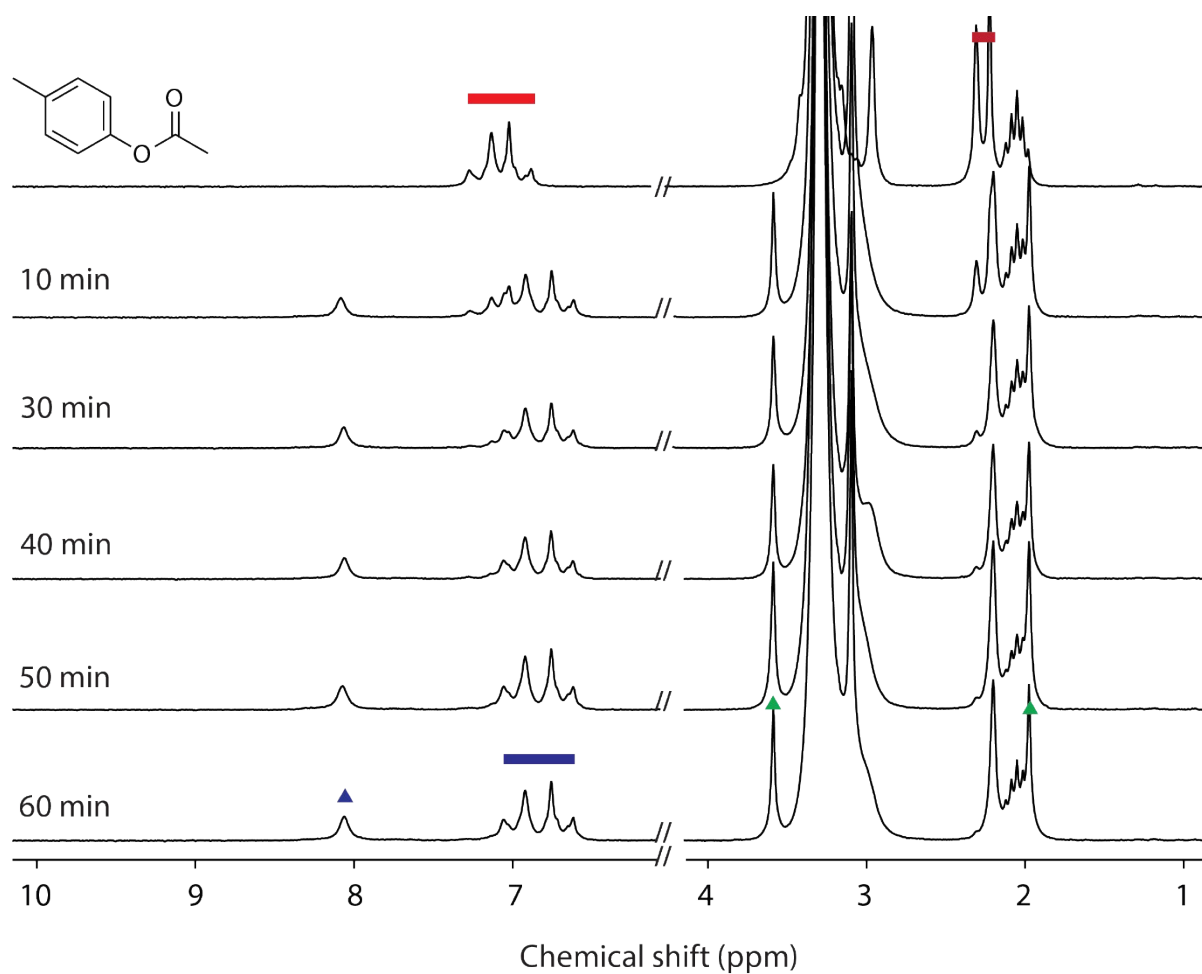

**Figure S13.** Time-dependent NMR monitoring for transesterification reaction of *p*-tolyl acetate (**Sub-2**, 500  $\mu\text{mol}$ , 75 mg) and methanol with cat. 10 mol% (19.5 mg)  $[\text{ZnL}]_n$  (red: substrate, green: methyl acetate, blue: *p*-cresol).

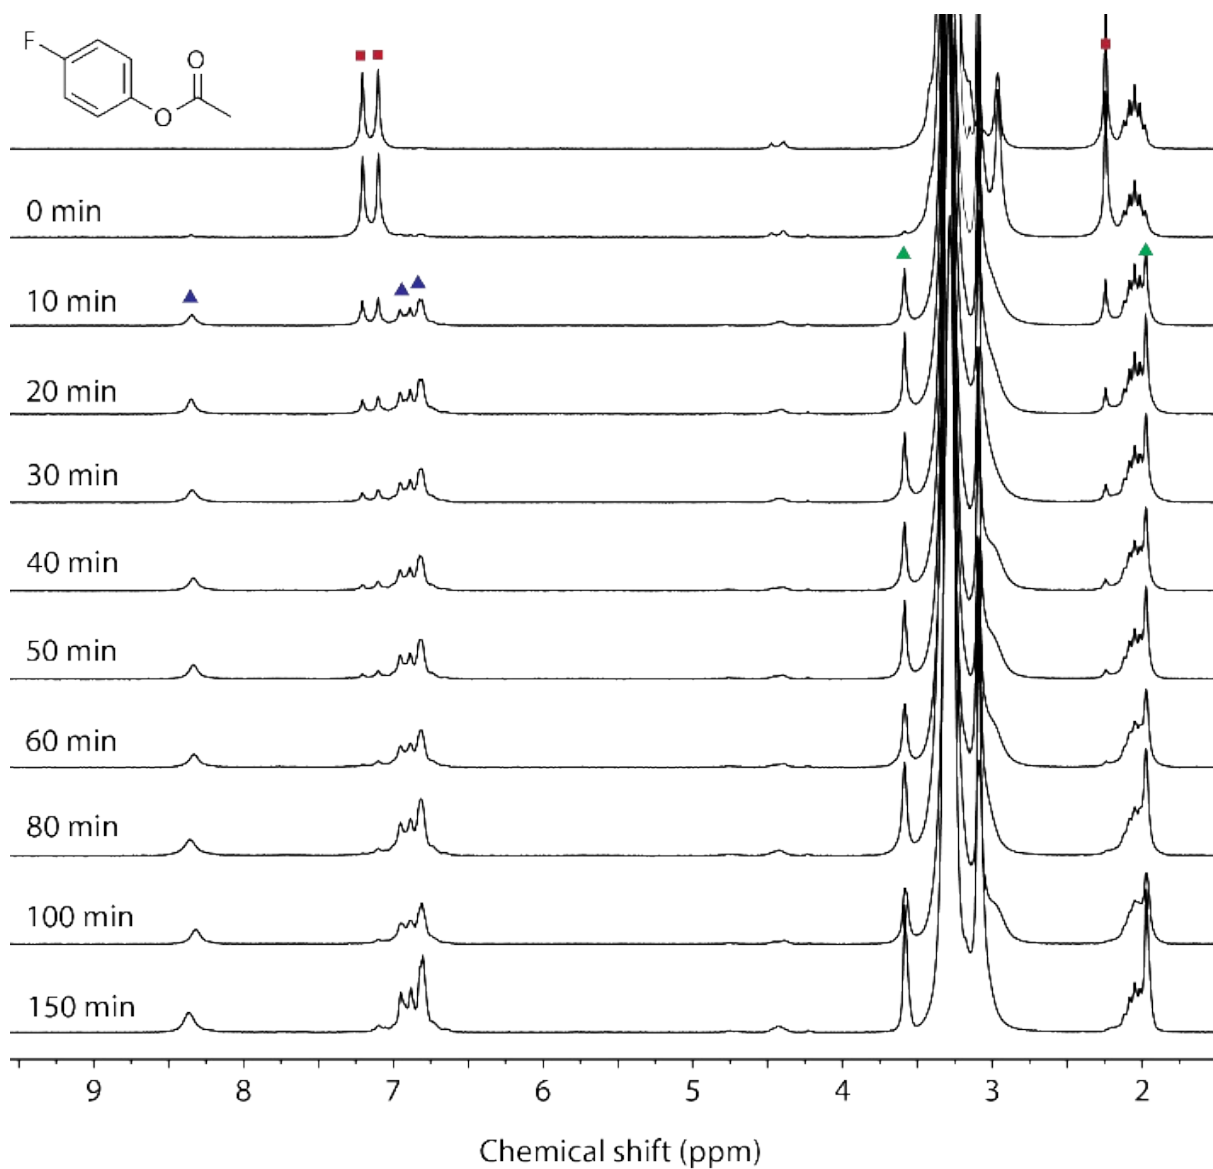

**Figure S14.** Time-dependent NMR monitoring for transesterification reaction of 4-fluorophenyl acetate (**Sub-3**, 500  $\mu$ mol, 77 mg) and methanol with cat. 10 mol% (19.5 mg) [ZnL]<sub>n</sub> (red: substrate, green: methyl acetate, blue: 4-fluorophenol).



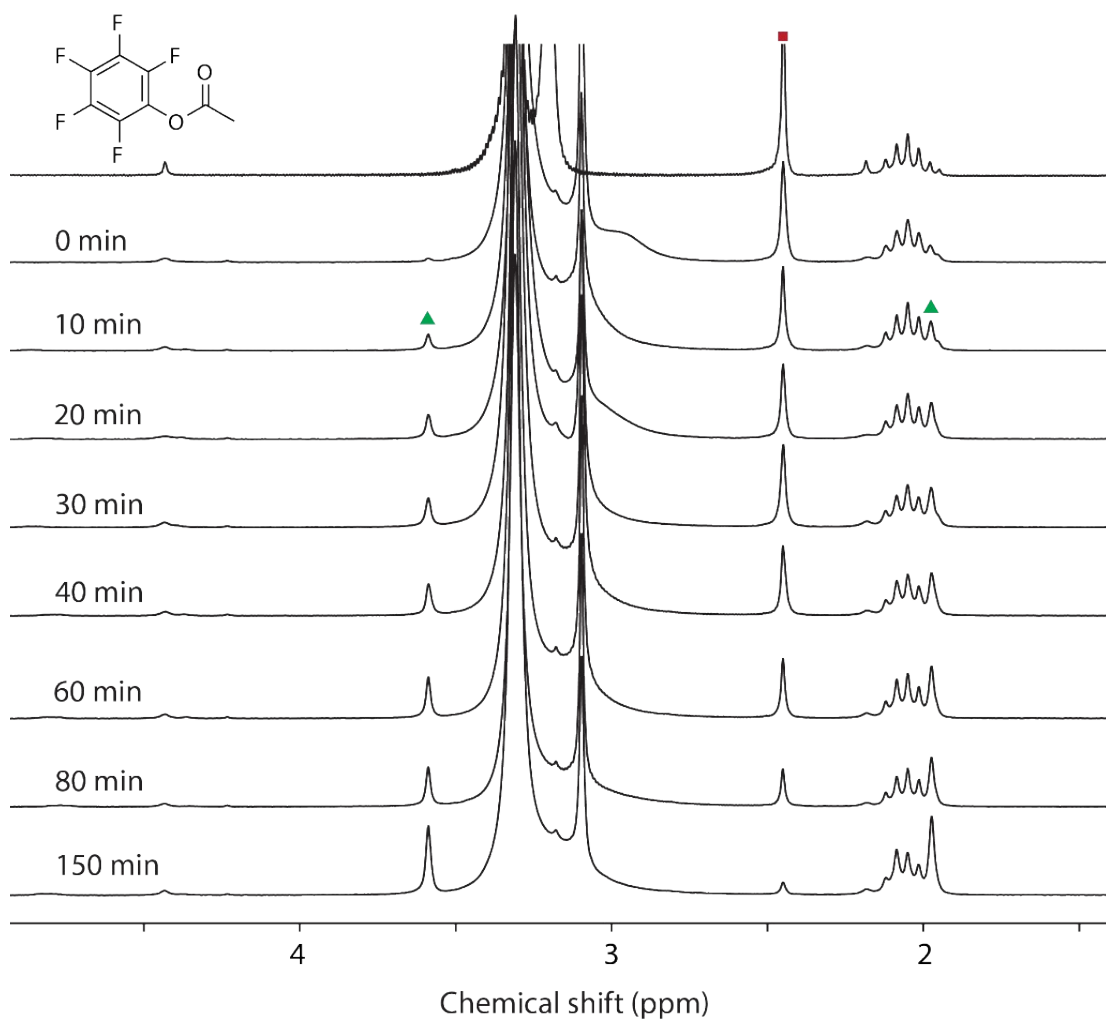

**Figure S15.** Time-dependent NMR monitoring for transesterification reaction of pentafluorophenyl acetate (**Sub-4**, 500  $\mu\text{mol}$ , 133 mg) and methanol with cat. 10 mol% (19.5 mg)  $[\text{ZnL}]_n$  (red: substrate, green: methyl acetate, blue: pentafluorophenol).

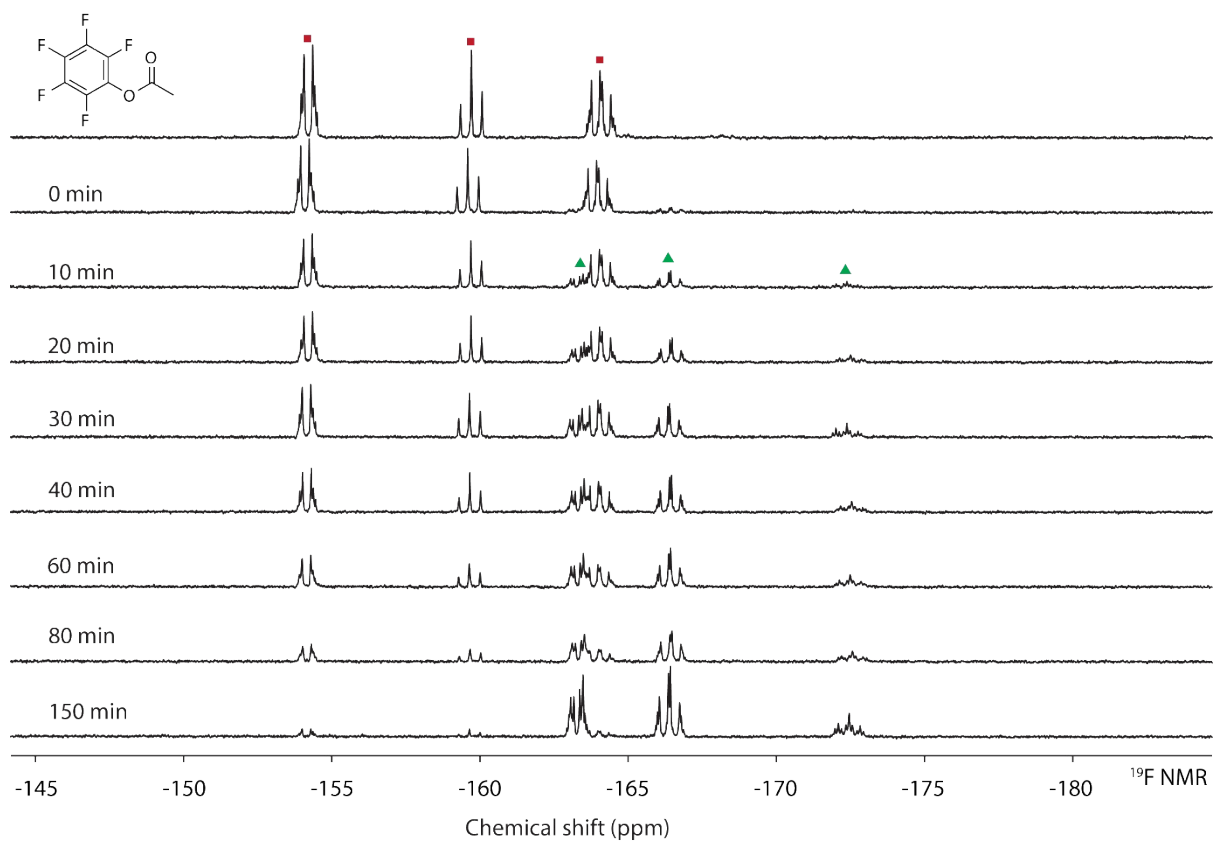

**Figure S16.** Time-dependent  $^{19}\text{F}$ -NMR monitoring for transesterification reaction of **Sub-4** and methanol with cat. 10 mol%  $[\text{ZnL}]_n$  (red: substate, blue: pentafluorophenol).

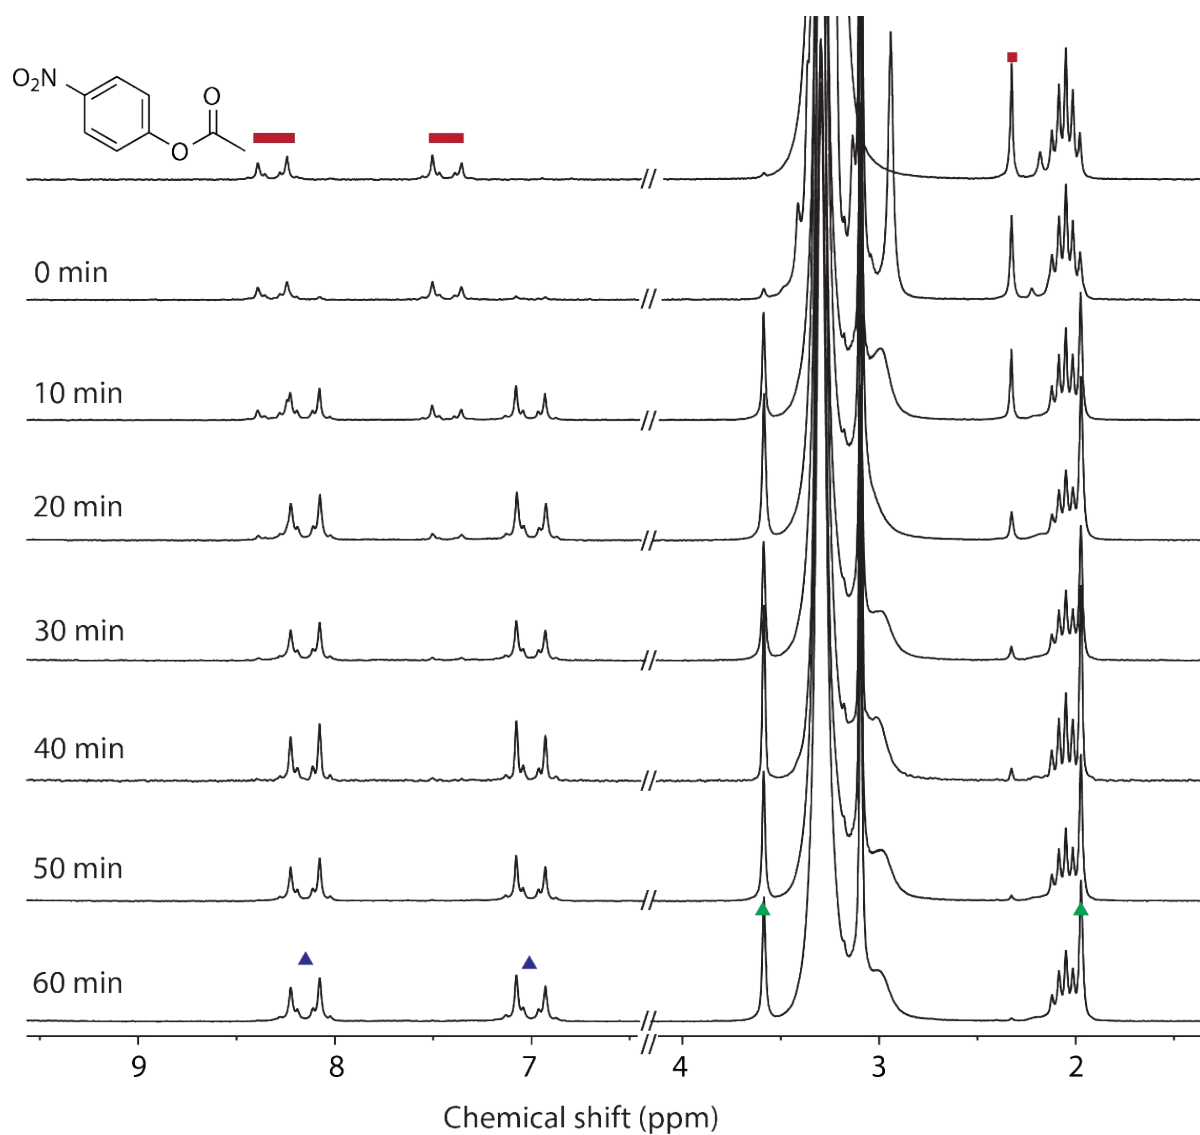

**Figure S17.** Time-dependent NMR monitoring for transesterification reaction of 4-nitrophenyl acetate (Sub-5, 500  $\mu\text{mol}$ , 91 mg) and methanol with cat. 10 mol% (19.5 mg)  $[\text{ZnL}]_n$  (red: substrate, green: methyl acetate, blue: 4-nitrophenyl).

| Sample       | Reaction time | Starting / Product (Area) | Starting / Product (ratio) |
|--------------|---------------|---------------------------|----------------------------|
| <b>Sub-1</b> | 50 min        | 5.06 / 0.37               | 93 / 7                     |
|              | 100 min       | 3.51 / 0.80               | 81 / 19                    |
| <b>Sub-2</b> | 50 min        | 0/2.99                    | 0 / 100                    |
|              | 100 min       | 0/3.51                    | 0 / 100                    |
| <b>Sub-3</b> | 50 min        | 0.45/2.18                 | 17 / 83                    |
|              | 100 min       | 0/1.57                    | 0 / 100                    |
| <b>Sub-4</b> | 50 min        | 3.19/0.316                | 91 / 9                     |
|              | 100 min       | 1.34/0.85                 | 61 / 39                    |

**Figure S18.** Substrate-dependent catalytic yield that measured by GC-MS after the reaction with methanol and 10 mol%  $[\text{ZnL}]_n$  at 50 min and 100 min.

## 4.2 Recyclability experiment

To test the recyclability of  $[\text{ZnL}]_n$  catalyst, the transesterification reaction (10 mol%  $[\text{ZnL}]_n$ ) was conducted on **Sub-2** with methanol up to 5 cycles with the same conditions previously reported. After each cycle, the catalyst was recovered by filtration, washed with methanol and the checked by PXRD. From the second cycle, the reaction required longer time to reach full conversion of the substrate, as monitored by NMR spectroscopy. We performed the reaction until full conversion, to avoid possible contaminations from the substrate to the subsequent cycles.

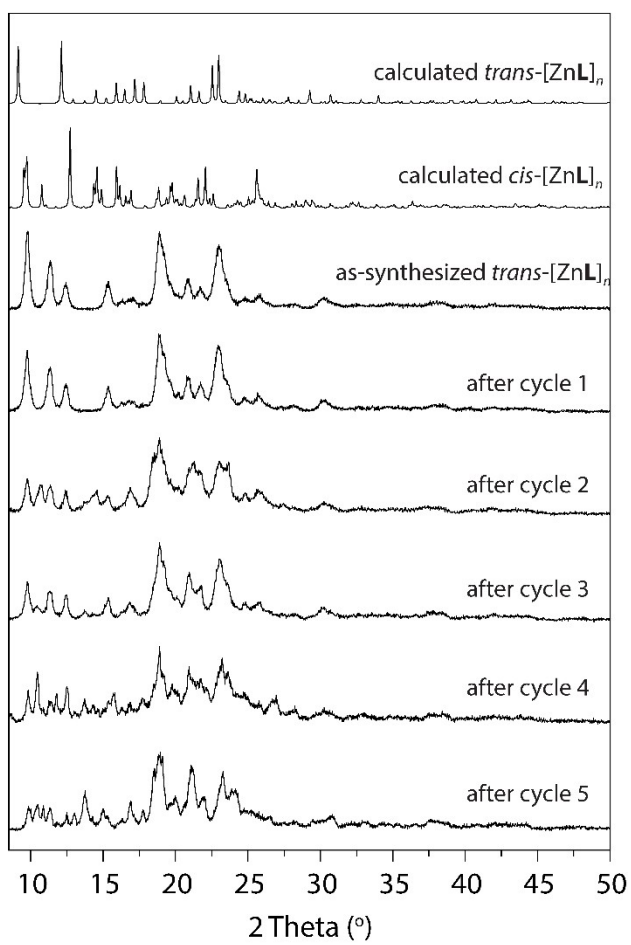

**Figure S19.** Calculated powder XRD patterns of *trans*-[ZnL]<sub>n</sub> and *cis*-[ZnL]<sub>n</sub>, as-synthesized [ZnL]<sub>n</sub>, and after up to 5 cycles of catalytic reactions.

| Cycle | Yield (1h)<br>(%) | Yield (1.5h)<br>(%) | Yield (2.5h)<br>(%) | Yield<br>(3.5h) (%) | [ZnL] <sub>n</sub><br>recovery after<br>catalysis (%) |
|-------|-------------------|---------------------|---------------------|---------------------|-------------------------------------------------------|
| 1     | 94.2              | 100                 |                     |                     | 97                                                    |
| 2     | 84.0              | 92.3                | 100                 |                     | 99                                                    |
| 3     | 77.9              | 85.8                | 100                 |                     | 91                                                    |
| 4     | --                | --                  | 67                  | 100                 | 90                                                    |
| 5     | --                | --                  | --                  | 100                 | 99                                                    |

**Table S3.** Recyclability of [ZnL]<sub>n</sub>: yield for transesterification reaction of *p*-tolyl acetate (**Sub-2**) after 5 catalytic cycles and catalyst recovery yield after each cycle.

### 4.3 Experiment for switching effect in Catalysis for Transesterification

The on/off switching of the catalytic properties is carried out by removing or adding  $\text{Cl}^-$  to the system. To remove the anion, employing a silver salt in the form of  $\text{AgClO}_4$ , lead to precipitation of insoluble  $\text{AgCl}$  and consequent anion exchange of  $\text{Cl}^-$  with  $\text{ClO}_4^-$ , the latter being the same anion employed in the synthesis of the coordination polymer. On the other hand, addition of  $\text{NH}_4\text{Cl}$  leads to the reverse anion exchange, where  $\text{Cl}^-$  coordinate to  $\text{Zn(II)}$ . The choice of  $\text{NH}_4^+$  as a cation relies on the fact that the remaining  $\text{NH}_4^+$  and  $\text{ClO}_4^-$  does not interfere with the studied reactions.

#### 4.3.1 Turning on catalytic effects using silver(I) perchlorate

In a 2 mL vial, a methanol solution containing dispersed crystalline solid of  $[\text{Zn}_2\text{Cl}_4\text{L}]$  (16.7 mg, 25  $\mu\text{mol}$ ) was prepared. A methanol solution of 4 equiv. of  $\text{AgClO}_4$  (20.7 mg, 100  $\mu\text{mol}$ ) was slowly added to the reaction vial. The mixture was vigorously stirred at 50 °C for 1 h, resulting in grey-colored precipitate. Subsequently, **Sub-2** in methanol was added into the reaction solution (the mole ratio of substrate and catalyst is 20:1) and stirred at 50 °C. After 60 min and 90 min,  $^1\text{H}$  NMR spectra were obtained and integrated for reaction yield. Then the precipitate was filtered and the residue was prepared to obtain the Powder XRD pattern and used as a catalyst for transesterification.

#### 4.3.2. Turning off catalytic effects by adding chloride

In a 2 mL vial, a methanol solution containing dispersed crystalline solid of  $[\text{ZnL}]_n$  (19.5 mg, 25  $\mu\text{mol}$ ) was prepared. A methanol solution of 2 equiv. of  $\text{NH}_4\text{Cl}$  (2.7 mg, 50  $\mu\text{mol}$ ) was dropwisely added to the reaction vial. The mixture was vigorously stirred at 50 °C for 1 h. Subsequently, **Sub-2** (75 mg, 500  $\mu\text{mol}$ ) in methanol was added into the reaction solution (the mole ratio of substrate and catalyst is 20:1) and stirred at 50 °C. After 60 min and 90 min,  $^1\text{H}$  NMR spectra were obtained and integrated for reaction yield. After filtration and drying, the residue was prepared to obtain the Powder XRD pattern and used as a catalyst for transesterification.



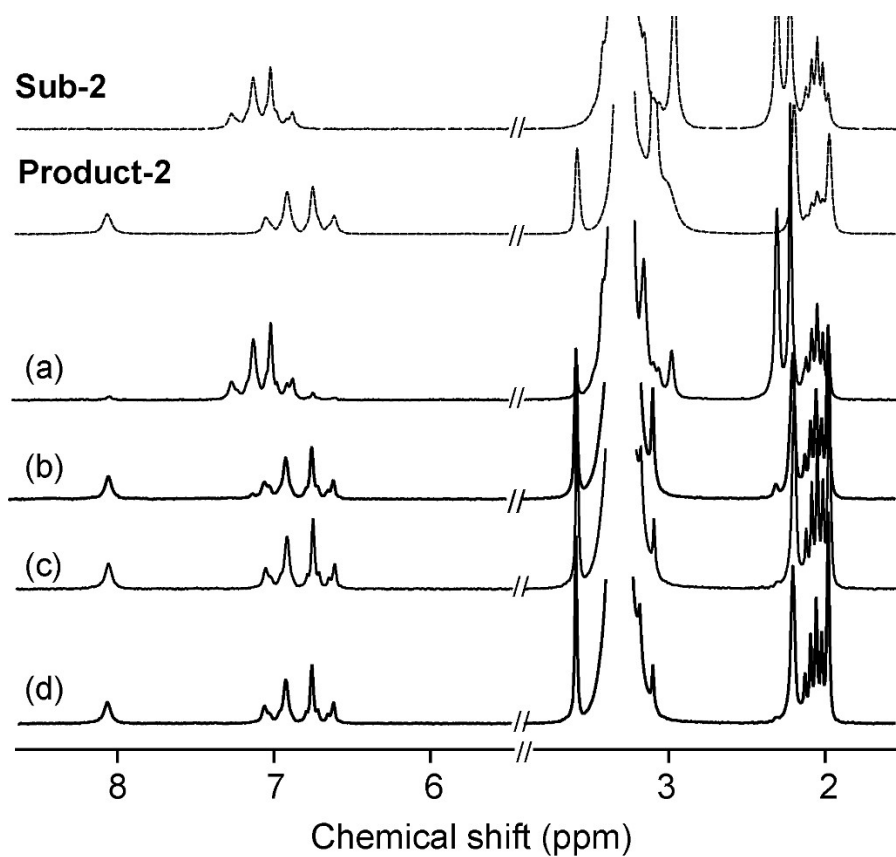

**Figure S20.** <sup>1</sup>H NMR data showing the catalytic switching effect controlled by anion exchange, the catalytic yields after 1 h reaction of **Sub-2** and [Zn<sub>2</sub>Cl<sub>4</sub>L] (a). Subsequently, stoichiometric equivalent of AgClO<sub>4</sub> was added into reaction solution of (a) and reacted for 1 h (b) and 1.5 h (c), respectively. A catalytic yield at 1.5 hr reaction from the mixture of [Zn<sub>2</sub>Cl<sub>4</sub>L], AgClO<sub>4</sub>, and **Sub-2** (d).

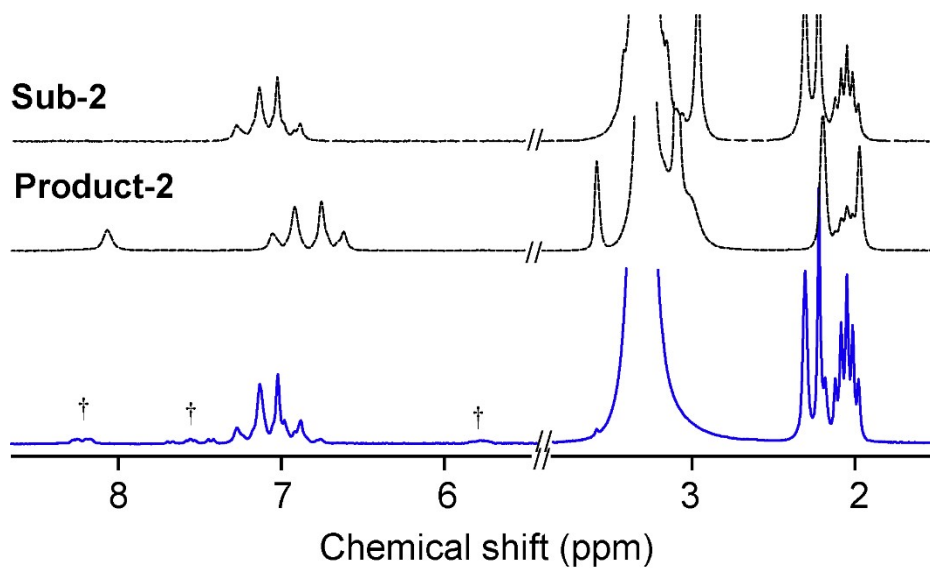

**Figure S21.** In-situ catalytic reaction of **Sub-2** monitored by <sup>1</sup>H NMR spectra after anion exchange from [ZnL]<sub>n</sub> using NH<sub>4</sub>Cl. Reaction condition: **Sub-2** (75 mg, 25 μmol); [ZnL]<sub>n</sub> (19.5 mg, 500 μmol), NH<sub>4</sub>Cl (2.7 mg, 50 μmol) for 1.5 h reaction in 500 μL methanol (blue), dagger represents free L.

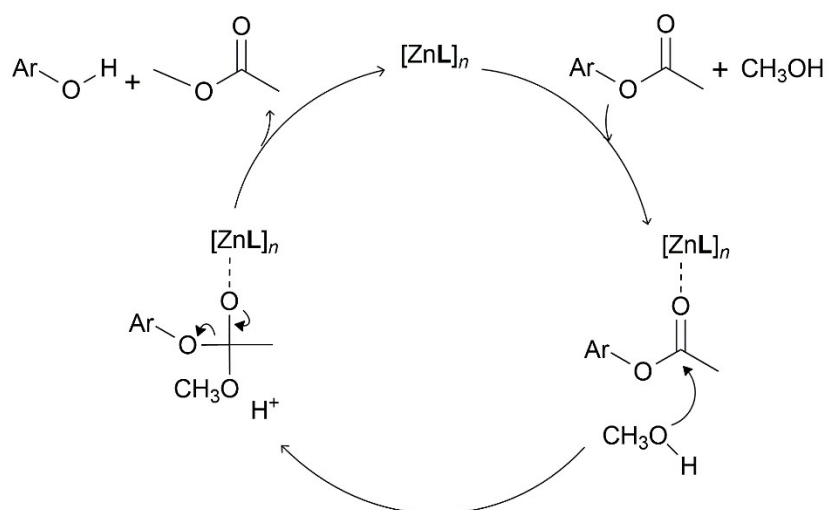

**Figure S22.** Proposed mechanism for transesterification using  $[ZnL]_n$ .

## 5. Reference

- 1 G. M. Sheldrick, SHELXT – Integrated space-group and crystal-structure determination, *Acta Crystallogr. Sect. A Found. Adv.*, 2015, **71**, 3–8.
- 2 G. M. Sheldrick, Crystal structure refinement with SHELXL, *Acta Crystallogr. Sect. C Struct. Chem.*, 2015, **71**, 3–8.
- 3 C. B. Hübschle, G. M. Sheldrick and B. Dittrich, ShelXle : a Qt graphical user interface for SHELXL, *J. Appl. Crystallogr.*, 2011, **44**, 1281–1284.
